# Supplementary material for: Computational investigation of gas detection and selectivity on TiS3 nanoflakes supported by experimental evidence
Source: Royal Society of Chemistry journal article supplement (doi:10.1039/c8cp05026k), 2018-01-01
Supplement: c8cp05026k1.pdf [file c8cp05026k1.pdf]

Journal Name

ARTICLE TYPE

Cite this: DOI: 10.1039/xxxxxxxxxx

## **Supplementary Information for: Computational investigation of gas detection and selectivity on $\text{TiS}_3$ nanoflakes supported by experimental evidence**

Masoud Aryanpour,<sup>a,\*</sup> Nassim Rafiefard<sup>b</sup>, Seyed Hossein Hosseini-Shokouh<sup>b</sup>, Somayeh Fardindoost<sup>b</sup>, and Azam Irajizad<sup>a,b</sup>

<sup>a,d</sup> Institute for Nanoscience and Nanotechnology, Sharif University of Technology, Tehran 11365-9161, Iran; E-mail: masoud@stanfordalumni.org.

<sup>b</sup> Department of Physics, Sharif University of Technology, Tehran 11365-9161, Iran.

## List of Figures

|     |                                                                                                                 |   |
|-----|-----------------------------------------------------------------------------------------------------------------|---|
| S1  | Computational slab model for surface (010) having 32 atoms. . . . .                                             | 3 |
| S2  | Computational slab model for surface (010) having 72 atoms. . . . .                                             | 3 |
| S3  | Computational slab model for surface (101) having 32 atoms. . . . .                                             | 3 |
| S4  | Computational slab model for surface (101) having 72 atoms. . . . .                                             | 3 |
| S5  | Computational slab model for surface (001) having 48 atoms. . . . .                                             | 3 |
| S6  | Computational slab model for surface (001) having 64 atoms. . . . .                                             | 4 |
| S7  | Optimized structure of adsorbed H <sub>2</sub> O molecule on defect-free (001) . . . . .                        | 4 |
| S8  | Optimized structure of adsorbed H <sub>2</sub> O molecule on double S-deficient (001) . . . . .                 | 4 |
| S9  | Optimized structure of adsorbed H <sub>2</sub> molecule on defect-free (001) . . . . .                          | 4 |
| S10 | Optimized structure of adsorbed H <sub>2</sub> molecule on double S-deficient (001) . . . . .                   | 4 |
| S11 | Optimized structure of adsorbed O <sub>2</sub> molecule on defect-free (001) . . . . .                          | 4 |
| S12 | Optimized structure of adsorbed O <sub>2</sub> molecule on double S-deficient (001) . . . . .                   | 5 |
| S13 | Optimized structure of adsorbed CH <sub>4</sub> molecule on defect-free (001) . . . . .                         | 5 |
| S14 | Optimized structure of adsorbed CH <sub>4</sub> molecule on double S-deficient (001) . . . . .                  | 5 |
| S15 | Optimized structure of adsorbed C <sub>2</sub> H <sub>5</sub> OH molecule on defect-free (001) . . . . .        | 5 |
| S16 | Optimized structure of adsorbed C <sub>2</sub> H <sub>5</sub> OH molecule on double S-deficient (001) . . . . . | 5 |
| S17 | Ethanol geometry on defect-free surface corresponding to peak -1.1eV . . . . .                                  | 5 |
| S18 | Ethanol geometry on double S-deficient surface corresponding to peak -1.1eV . . . . .                           | 6 |

**Note:** In all figures S7 to S16, only the slab atoms of configuration No.1 are visible, that is, all Ti and S atoms that belong to the other configurations are hidden for clarity.

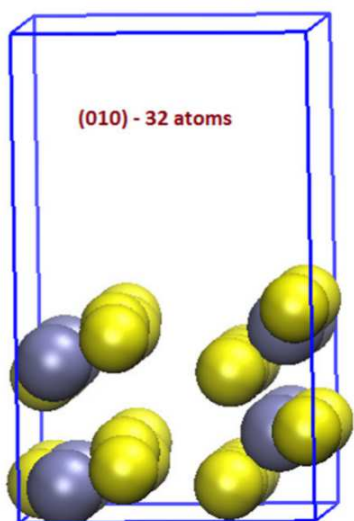

**Fig. S1** Computational slab model for surface (010) having 32 atoms.

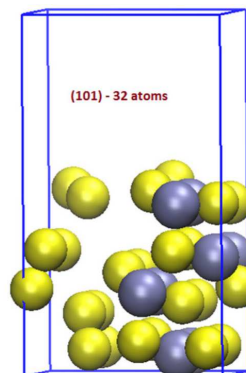

**Fig. S3** Computational slab model for surface (101) having 32 atoms.

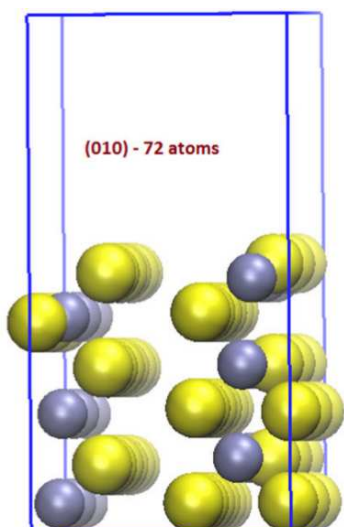

**Fig. S2** Computational slab model for surface (010) having 72 atoms.

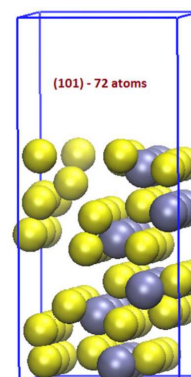

**Fig. S4** Computational slab model for surface (101) having 72 atoms.

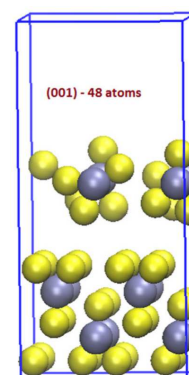

**Fig. S5** Computational slab model for surface (001) having 48 atoms.

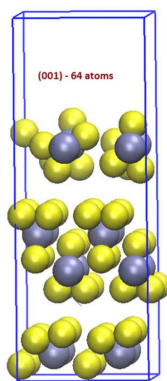

**Fig. S6** Computational slab model for surface (001) having 64 atoms.

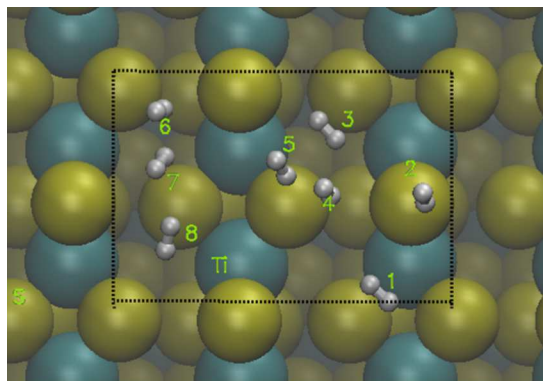

**Fig. S9** Optimized structure of adsorbed  $\text{H}_2$  molecule on defect free (001). Each number corresponds to a separate calculation.

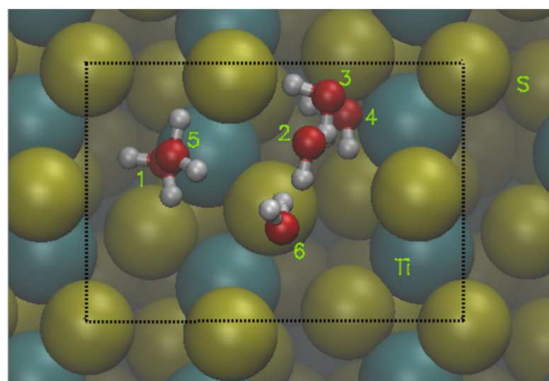

**Fig. S7** Optimized structure of adsorbed  $\text{H}_2\text{O}$  molecule on defect free (001). Each number corresponds to a separate calculation. Only one slab surface is visible.

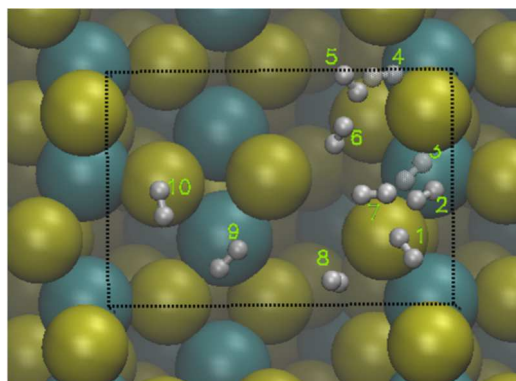

**Fig. S10** Optimized structure of adsorbed  $\text{H}_2$  molecule on double S-deficient (001). Each number corresponds to a separate calculation.

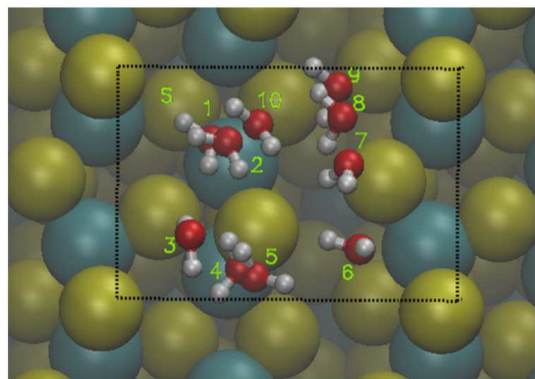

**Fig. S8** Optimized structure of adsorbed  $\text{H}_2\text{O}$  molecule on double S-deficient (001). Each number corresponds to a separate calculation.

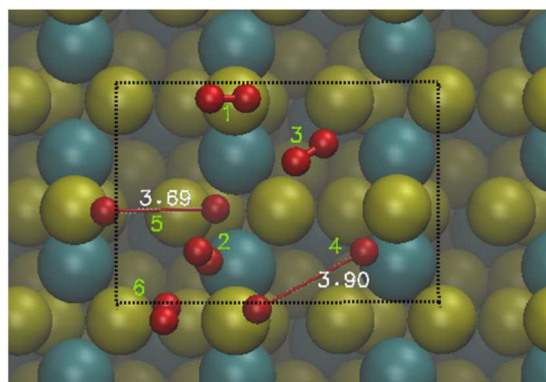

**Fig. S11** Optimized structure of adsorbed  $\text{O}_2$  molecule on defect free (001). Each number corresponds to a separate calculation. Those O-O pairs falling at more than 3 Å apart indicate dissociative adsorption.

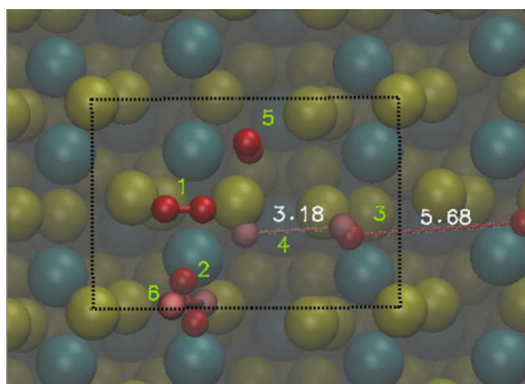

**Fig. S12** Optimized structure of adsorbed  $\text{O}_2$  molecule on double S-deficient (001). Each number corresponds to a separate calculation. Those O-O pairs falling at more than 3 Å apart indicate dissociative adsorption.

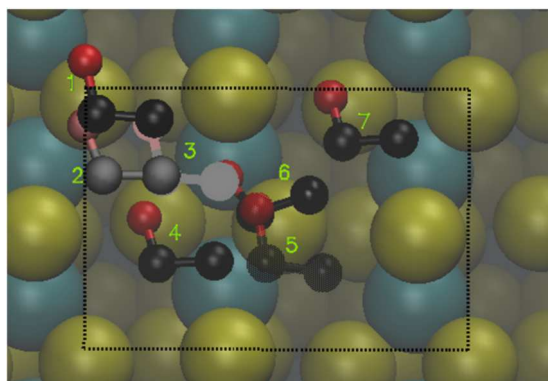

**Fig. S15** Optimized structure of adsorbed  $\text{C}_2\text{H}_5\text{OH}$  molecule on defect free (001). Each number corresponds to a separate calculation.

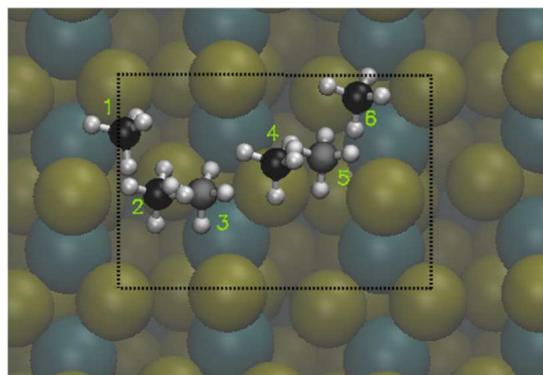

**Fig. S13** Optimized structure of adsorbed  $\text{CH}_4$  molecule on defect free (001). Each number corresponds to a separate calculation.

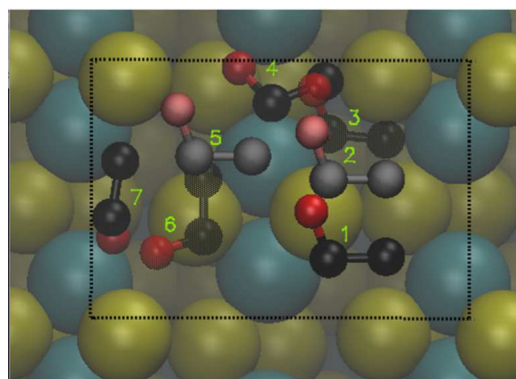

**Fig. S16** Optimized structure of adsorbed  $\text{C}_2\text{H}_5\text{OH}$  molecule on double S-deficient (001). Each number corresponds to a separate calculation.

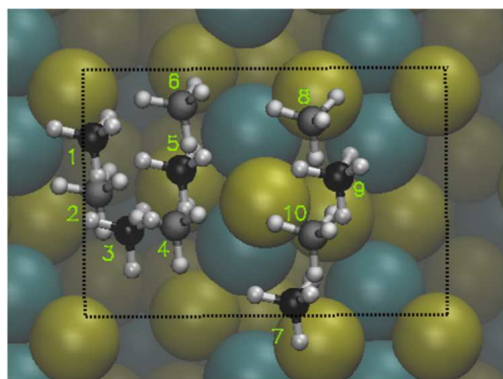

**Fig. S14** Optimized structure of adsorbed  $\text{CH}_4$  molecule on double S-deficient (001). Each number corresponds to a separate calculation.

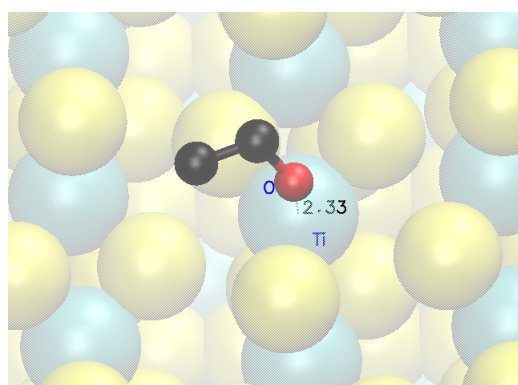

**Fig. S17** Geometry of the ethanol molecule on the stoichiometric surface. This particular structure corresponds to the energy peak at about -1.1 eV.



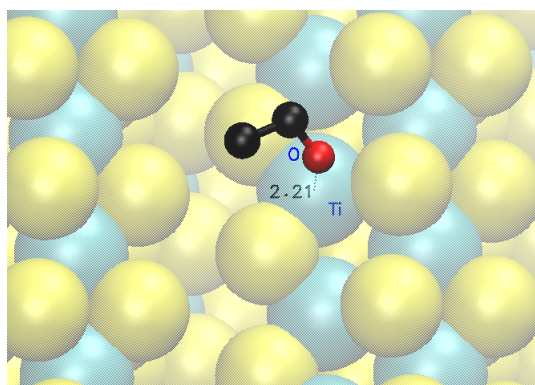

**Fig. S18** Geometry of the ethanol molecule on the double S-deficient surface. This particular structure corresponds to the energy peak at about -1.1 eV.
